1 **Using parametric g-computation to estimate the effect of long-term exposure**  
2 **to air pollution on mortality risk and simulate the benefits of hypothetical**  
3 **policies: the Canadian Community Health Survey cohort (2005 to 2015)**

4 Chen Chen<sup>1</sup>, Hong Chen<sup>2,3,4,5\*</sup>, Aaron van Donkelaar<sup>6</sup>, Richard T. Burnett<sup>2</sup>, Randall V. Martin<sup>6</sup>,  
5 Li Chen<sup>2</sup>, Michael Tjepkema<sup>7</sup>, Megan Kirby-McGregor<sup>8</sup>, Yi Li<sup>8</sup>, Jay S. Kaufman<sup>8</sup>, Tarik  
6 Benmarhnia<sup>1\*</sup>

7 <sup>1</sup>Scripps Institution of Oceanography, University of California San Diego, La Jolla, California,  
8 USA

9 <sup>2</sup>Environmental Health Science and Research Bureau, Health Canada, Ottawa, Ontario, Canada

10 <sup>3</sup>Public Health Ontario, Toronto, Ontario, Canada

11 <sup>4</sup>ICES, Toronto, Ontario, Canada

12 <sup>5</sup>Dalla Lana School of Public Health, University of Toronto, Toronto, Ontario, Canada

13 <sup>6</sup>Department of Energy, Environmental, and Chemical Engineering, Washington University in St.  
14 Louis, St. Louis, Missouri, USA

15 <sup>7</sup>Health Analysis Division, Statistics Canada, Ottawa, Ontario, Canada

16 <sup>8</sup>Department of Epidemiology, Biostatistics and Occupational Health, McGill University,  
17 Montreal, Quebec, Canada

18

19 \*Co-senior authors

20 Corresponding author: Chen Chen ([chc048@ucsd.edu](mailto:chc048@ucsd.edu))

21 Address: 8885 Biological Grade, La Jolla, CA 92037, USA

22

23 **Conflicts of interest:** The authors declare they have nothing to disclose.

24

25 **Funding:** This study was funded by Health Canada (#810630). The funder supported the study  
26 design, data collection and analysis in this study.

27

28

## 29 **Abstract**

### 30 **Background**

31 Numerous epidemiological studies have documented the adverse health impact of long-term  
32 exposure to fine particulate matter (PM<sub>2.5</sub>) on mortality even at relatively low levels. However,  
33 methodological challenges remain to consider potential regulatory intervention's complexity and  
34 provide actionable evidence on the predicted benefits of interventions. We propose the  
35 parametric g-computation as an alternative analytical approach to such challenges.

### 36 **Method**

37 We applied the parametric g-computation to estimate the cumulative risks of non-accidental  
38 death under different hypothetical intervention strategies targeting long-term exposure to PM<sub>2.5</sub>  
39 in the Canadian Community Health Survey cohort from 2005 to 2015. On both relative and  
40 absolute scales, we explored benefits of hypothetical intervention strategies compared to the  
41 natural course that 1) set the simulated exposure value at each follow-up year to a threshold  
42 value if exposure was above the threshold (8.8 µg/m<sup>3</sup>, 7.04 µg/m<sup>3</sup>, 5 µg/m<sup>3</sup>, and 4 µg/m<sup>3</sup>); and 2)  
43 reduce the simulated exposure value by a percentage (5% and 10%) at each follow-up year. We  
44 used the three-year average PM<sub>2.5</sub> concentration with one-year lag at the postal code of  
45 respondents' annual mailing addresses as their long-term exposure to PM<sub>2.5</sub>. We considered  
46 baseline and time-varying confounders including demographics, behavior characteristics, income  
47 level, and neighborhood socioeconomic status. We also included the R syntax for reproducibility  
48 and replication.

### 49 **Results**

50 All hypothetical intervention strategies explored led to lower 11-year cumulative mortality risks  
51 than the estimated value under natural course without intervention, with the smallest reduction of  
52 0.20 per 1000 participants (95% CI: 0.06 to 0.34) under the threshold of 8.8 µg/m<sup>3</sup>, and the  
53 largest reduction of 3.40 per 1000 participants (95% CI: -0.23 to 7.03) under the relative  
54 reduction of 10% per interval. The reductions in cumulative risk, or numbers of deaths that  
55 would have been prevented if the intervention was employed instead of maintaining status quo,  
56 increased over time but flattened towards the end of follow-up. Estimates among those ≥65 years  
57 were greater with a similar pattern. Our estimates were robust to different model specifications.

### 58 **Discussion**

59 We found evidence that any intervention further reducing the long-term exposure to PM<sub>2.5</sub> would  
60 reduce the cumulative mortality risk, with greater benefits in the older population, even in a  
61 population already exposed to low levels of ambient PM<sub>2.5</sub>. The parametric g-computation used  
62 in this study provides flexibilities in simulating real world interventions, accommodates time-  
63 varying exposure and confounders, and estimates adjusted survival curves with clearer  
64 interpretation and more information than a single hazard ratio, making it a valuable analytical  
65 alternative in air pollution epidemiological research.

## 66 Introduction

67 As collective efforts in previous decades have successfully reduced the level of fine particulate  
68 matter (PM<sub>2.5</sub>) globally, quantifying the effectiveness of policies that further reduce ambient  
69 PM<sub>2.5</sub> is becoming particularly important in supporting evidence-based policymaking. Indeed,  
70 previous studies found consistent evidence of deleterious associations between long-term  
71 exposure to low levels of PM<sub>2.5</sub> (e.g., below the current health-based standards or guidelines) and  
72 risk of mortality<sup>1-6</sup> and morbidity,<sup>7-9</sup> suggesting potential reductions in health burden if the PM<sub>2.5</sub>  
73 level were to be further reduced. While the evaluation of exposure-response functions in  
74 existing studies provides important information in understanding the potential effectiveness of  
75 policies, further methodological considerations are required to estimate the potential benefits of  
76 realistic interventions.

77 First, evidence suggested that the risk associated with the changes in acute exposure to PM<sub>2.5</sub>  
78 could vary with time,<sup>10-13</sup> potentially due to changes in chemical compositions of PM<sub>2.5</sub> with  
79 different toxicity and population susceptibility towards PM<sub>2.5</sub>.<sup>14,15</sup> Similar disparity in toxicity  
80 across long-term exposure to PM<sub>2.5</sub> components was also observed,<sup>16,17</sup> suggesting that such  
81 temporal changes could exist in risk associated with long-term exposure to PM<sub>2.5</sub>. In other words,  
82 it is important to use analytical methods flexible enough to incorporate such temporal changes in  
83 estimation of related health burdens. However, existing studies of health impacts of long-term  
84 exposure to PM<sub>2.5</sub> generally considered time-fixed exposure and confounders (see Table S1 for a  
85 narrative review of recent studies on health impact of long-term exposure to PM<sub>2.5</sub> and their  
86 methodological considerations). Furthermore, the most widely used estimate for exposure-  
87 response function in this field is a single hazard ratio (HR) for the follow-up period estimated  
88 with a standard Cox-proportional hazard model (Table S1), which is assumed to be constant over  
89 time and precludes consideration of temporal changes. Although extension of a Cox-proportional  
90 hazard model could provide period-specific HRs that incorporate temporal changes,<sup>18</sup> recent  
91 developments in causal inference literature raise concern about the ambiguity in the causal  
92 interpretation of HR and period-specific HRs.<sup>19</sup> Specifically, period-specific HRs have a built-in  
93 selection bias because susceptible people exposed to higher PM<sub>2.5</sub> are more likely to die early if  
94 PM<sub>2.5</sub> truly increases risk of mortality, and are removed from the susceptible population in later  
95 time.<sup>20</sup> This differential depletion of susceptible subjects over time can lead to artificially  
96 diminished or even reversed period-specific HR later in study even when the cumulative survival  
97 is still lower among those exposed to higher PM<sub>2.5</sub>, violating the proportional assumption and  
98 hindering interpretation.<sup>21</sup>

99 Second, calculation of health burden related to long-term exposure to PM<sub>2.5</sub> commonly employed  
100 exposure-response function previously estimated with the static intervention strategy, where a  
101 fixed change of exposure value was assigned to the entire population.<sup>22(chap19)</sup> However, the more  
102 flexible and realistic dynamic intervention strategy, where the exposure value was assigned  
103 based on individuals' history of covariates including exposure, is hard to apply when existing  
104 exposure-response functions are used.<sup>22(chap19)</sup> Methods capable of incorporating dynamic  
105 intervention strategy to imitate complexities in actual regulatory interventions are needed to  
106 provide direct evidence on effectiveness of air pollution control policies.<sup>23</sup> To fill this gap in  
107 knowledge translation, we propose the parametric g-computation as an analytical alternative in

108 air pollution epidemiological research, which could better predict the effectiveness of  
109 hypothetical policies while being more flexible in resembling real world interventions.

110 G-computation (also known as g-formula) is a generalization of non-parametric standardization  
111 developed under the potential outcome framework for causal inference,<sup>24</sup> and parametric g-  
112 computation is a variation that employs parametric modeling. Under the consistency (i.e., the  
113 exposure is defined unambiguously, and all exposed individuals receive the same version of  
114 treatment),<sup>22(chap3),25</sup> exchangeability (i.e., no unmeasured confounding or informative  
115 censoring),<sup>25</sup> and positivity (i.e., probability of receiving every exposure conditioning on  
116 confounders is greater than zero) assumptions,<sup>22(chap3)</sup> and a time-to-event outcome setting, g-  
117 computation can provide marginal causal risk estimates at each follow-up time point under  
118 hypothetical intervention strategies (i.e. adjusted survival curves), while allowing other  
119 population characteristics to be altered according to the intervention.<sup>26</sup> Particularly, parametric g-  
120 computation excels in estimating adjusted survival curves under dynamic intervention strategies.  
121 In other words, g-computation can directly answer causal questions such as: how many lives  
122 could we save if we promulgate a policy that further reduces air pollution to levels lower than the  
123 current standard among those whose exposure were above the current standard, compared to  
124 maintaining the status quo? Although parametric g-computation has been widely applied in other  
125 fields of epidemiology,<sup>27-30</sup> application in air pollution studies remains limited. Previous  
126 applications in this field either focused on a small cohort in occupational settings,<sup>31-33</sup> or  
127 modelled simple air pollution changes on asthmatic outcomes among children (i.e. not  
128 considering time-varying confounding nor changes in effect estimates over time).<sup>34,35</sup>

129 In this study, we aim to demonstrate the use of parametric g-computation to evaluate the  
130 effectiveness of hypothetical intervention strategies targeting long-term exposure to PM<sub>2.5</sub> on  
131 reducing mortality using a Canadian cohort experiencing low PM<sub>2.5</sub> exposure from 2005 to 2015.  
132 This analytical alternative can account for previously unaddressed complexities, refine the effect  
133 estimates with less restrictive identification conditions and provide estimates more intuitive to  
134 policy makers.

## 135 **Methods**

### 136 *Study population*

137 We created a retrospective cohort with respondents to the Canadian Community Health Survey  
138 (CCHS) from three enrolling cycles in the years of 2000/2001, 2003 and 2005, respectively.<sup>36-38</sup>  
139 CCHS is a national cross-sectional survey collecting health status, health care utilization and  
140 health determinants information of the Canadian population, covering the population 12 years  
141 and over in the ten provinces and the three territories. The survey excluded individuals living on  
142 reserves and other Aboriginal settlements, full-time members of the Canadian Forces, the  
143 institutionalized population, and residents of certain remote regions.

144 Among CCHS respondents who gave permission to share and link their information with other  
145 administrative datasets, we obtained their mailing address history and death records through  
146 December 31<sup>st</sup>, 2015 via Statistics Canada's Social Data Linkage Environment, using  
147 probabilistic methods based on common identifiers.<sup>2,39</sup> We focused on non-accidental death as

148 outcome (International Classification of Diseases ninth revision codes 001 to 799 and  
149 International Classification of Diseases tenth revision codes A to R) in this study. To facilitate  
150 pooling of results across cycles, we restricted the cohort to participants who were alive on  
151 January 1<sup>st</sup>, 2005 and used this date as the start of follow-up for all cycles. We also restricted our  
152 cohort to individuals older than 25 years and younger than 80 years in 2005 thus all cohort  
153 participants were adults and followed for 11 years or till death. Besides, we dropped respondents  
154 without data for covariates including exposure in 2005. This study was approved by the Health  
155 Canada-Public Health Agency of Canada Research Ethics Board.

#### 156 *Exposure assessment*

157 To estimate respondents' long-term exposure to PM<sub>2.5</sub>, we utilized the ground-level PM<sub>2.5</sub>  
158 concentrations from V4.NA.02.MAPLE of the Atmospheric Composition Analysis Group of  
159 Washington University,<sup>40</sup> which covers all of North America below 70°N. The 0.01° × 0.01°  
160 (roughly equivalent to 1×1km<sup>2</sup> at the latitudes where most Canadians live) annual estimates of  
161 PM<sub>2.5</sub> from 2001 to 2015 were derived using satellite retrievals of aerosol optical depth and  
162 chemical transport model simulations, and calibrated with ground-based observations using  
163 geographically weighted regression.<sup>41</sup> The annual estimates of PM<sub>2.5</sub> closely agree with long-  
164 term cross-validated ground measurements at fixed-site monitors (n=2,312) across North  
165 America (R<sup>2</sup>=0.70).<sup>41</sup> Using the ground-level PM<sub>2.5</sub> concentration surfaces described above, we  
166 first assigned the annual PM<sub>2.5</sub> concentration of the grid cell into which the postal code centroid  
167 falls as the postal code specific annual PM<sub>2.5</sub> concentrations. Then we calculated respondents'  
168 annual long-term exposure to PM<sub>2.5</sub> as three-year average postal code specific PM<sub>2.5</sub>  
169 concentrations with one-year lag based on their mailing address history (e.g., a respondent's  
170 long-term exposure to PM<sub>2.5</sub> in 2013 is the average of their postal code specific PM<sub>2.5</sub>  
171 concentrations in 2010, 2011 and 2012).<sup>2</sup> We utilized three-year average with one-year lag to  
172 represent long-term exposure of PM<sub>2.5</sub> so that the exposure always precedes the outcome and the  
173 timeframe is consistent with the regulatory review of Canadian Ambient Air Quality Standards  
174 for annual PM<sub>2.5</sub>.<sup>42</sup> This metric of long-term exposure to PM<sub>2.5</sub> was widely used in previous  
175 Canada based studies of long-term health impacts of PM<sub>2.5</sub>.<sup>2,43,44</sup>

#### 176 *Covariates other than exposure*

177 In this section we summarized the data sources and meaning of covariates in this study while the  
178 covariate selection to control for in our model will be discussed in the statistical analysis section.  
179 We used covariates to describe the collection of exposure, time-fixed confounders, and time-  
180 varying confounders in this study. Baseline characteristics of respondents were ascertained at the  
181 time of enrollment into CCHS via self-report and were processed using the same method as  
182 previous studies,<sup>2,43</sup> including sex, age (converted to value in 2005), body mass index, marital  
183 status, immigrant status, visible minority, indigenous status, smoking status, alcohol  
184 consumption, consumption of fruits and vegetables, leisure physical activity, working status, and  
185 educational attainment (details of variable categorization in Table 1). By using 2005 as the start  
186 of follow-up time for all individuals, we assumed that all baseline characteristics other than age  
187 ascertained at the time of enrollment would remain the same through the entire follow-up period.

188 We also obtained characteristics of the respondents and their neighborhoods through linkage  
189 with administrative datasets using similar methods as previous studies.<sup>2,43</sup> Specifically, we  
190 obtained annual income quintile of respondents through linkage with tax data based on common  
191 identifiers.<sup>43</sup> For person-years with missing annual family income, we imputed them with the  
192 nearest prior values and the proportions of missing are 5.21%, 4.97% and 4.69% for Cycle  
193 2000/2001, 2003 and 2005, respectively. We also obtained annual characteristics of  
194 neighborhoods through linkage with census data from the nearest census year based on  
195 respondents' mailing address postal codes, including community size at census metropolitan area  
196 level and four Canadian Marginalization Index at census dissemination area level. The Canadian  
197 Marginalization Index summarizes dissemination area-level socioeconomic status into four  
198 dimensions using principal component analysis to reduce the dimensionality of census data: the  
199 immigration and visible minority index combines information on proportion of recent  
200 immigrants and proportion of people self-identify as visible minority; the households and  
201 dwellings index combines information on types and density of residential accommodations and  
202 family structure characteristics; the material resources index combines information on access to  
203 and attainment of basic material needs; and the age and labour force index combines information  
204 on participation in labour force and proportion of seniors.<sup>45</sup> Last, we obtained airshed (six  
205 distinct regions of Canada that cut cross jurisdictional boundaries and showed similar air quality  
206 characteristics and air movement patterns within each region) to capture large scale spatial  
207 variation,<sup>46</sup> and urban form information of respondents' neighborhoods in 2005 to capture  
208 urbanicity of participants' residence, through linkage with census data.<sup>2</sup>

### 209 *Hypothetical intervention strategies*

210 In this study, we explored three types of intervention strategies: 1) applying the simulated value  
211 of time-varying covariates without any intervention (natural course); 2) setting the simulated  
212 long-term exposure to PM<sub>2.5</sub> value at each follow-up year to a threshold value if PM<sub>2.5</sub> was  
213 higher than the threshold (threshold intervention); and 3) reducing the simulated PM<sub>2.5</sub> value by a  
214 fixed percentage at each interval (i.e., follow-up year) (relative reduction intervention).  
215 Threshold values explored are the current Canadian Ambient Air Quality Standards for PM<sub>2.5</sub> of  
216 8.8 µg/m<sup>3</sup>, 80% of the current Canadian Ambient Air Quality Standards for PM<sub>2.5</sub> (or 7.04  
217 µg/m<sup>3</sup>), the new World Health Organization (WHO) air quality guideline of 5 µg/m<sup>3</sup>, and a PM<sub>2.5</sub>  
218 level that was further below the WHO guideline (4 µg/m<sup>3</sup>). Interval-specific relative reduction  
219 values explored are 10% and 5% per interval. To avoid extensive model extrapolation, we  
220 restricted the relative reduction intervention so that subjects with exposure below 1.8 µg/m<sup>3</sup>, the  
221 background PM<sub>2.5</sub> level in Canada,<sup>47</sup> will not be further reduced. The first type of intervention  
222 strategy represents the predicted covariates based on the observed data without intervening and  
223 serves as the reference for other strategies. The second and the third are dynamic intervention  
224 strategies that incorporate the impact of intervention on covariates during earlier time points  
225 while simulating covariates in later time points.

### 226 *Statistical analysis*

227 We applied parametric g-computation with different hypothetical intervention strategies  
228 targeting long-term exposure to PM<sub>2.5</sub> to understand the benefits of intervention strategies on

229 cumulative risk of non-accidental death. We conducted g-computation analysis for each  
230 enrollment cycle separately and pooled the results across cycles using meta-regression. Briefly,  
231 we estimated the cumulative mortality risk at each follow-up year standardized to the distribution  
232 of the confounders and long-term exposure to PM<sub>2.5</sub> in the study population, with all time-  
233 varying covariates (confounders and PM<sub>2.5</sub>) conditioned on covariates history, with and without  
234 intervention on PM<sub>2.5</sub> (i.e., adjusted survival curves). Next, we calculated the differences in  
235 cumulative mortality risks between the natural course and other intervention strategies on both  
236 absolute and relative scales to provide estimates for the benefits of hypothetical intervention  
237 strategies compared to maintaining status quo. We pooled results with fixed-effect meta-  
238 regression, which calculates a weighted average of cycle specific estimates with weights equal to  
239 the inverse of the variance using the “meta” package.<sup>48</sup>

240 The proof of parametric g-computation are described extensively elsewhere,<sup>22(chap21),29</sup> and  
241 detailed description of how to implement such an approach in a setting similar to our study was  
242 previously published,<sup>28</sup> with available R package for easy implementation.<sup>49</sup> However, since the  
243 application of parametric g-computation is limited in air pollution studies, we include a diagram  
244 (Figure 1) to summarize the four steps that carry out the g-computation in a time-to-event setting  
245 with time-varying exposure and confounders, and describe the steps in details below.

#### 246 *Steps to implement parametric g-computation*

247 In Step 1, we fitted a pooled logistic model (i.e., discrete-time hazard model) and adjusted for  
248 baseline characteristics, time-varying characteristics, quadratic function of year and interaction  
249 between long-term exposure to PM<sub>2.5</sub> and categorical year. The pooled logistic model estimated  
250 the probability of death during the year conditioning on survival till the start of the year given all  
251 covariates (including PM<sub>2.5</sub>), which allowed the conditional probability of death and its  
252 association with PM<sub>2.5</sub> to vary over year. We chose confounders to control for in the outcome  
253 model based on substantive knowledge of the relationship between long-term PM<sub>2.5</sub> and  
254 mortality as summarized in the simplified directed acyclic graph (Figure S1). We included a full  
255 list of covariates in Table 1 with specific forms of covariates in Table 2. We included both  
256 individual socioeconomic status indicators (e.g., education and family income) and community  
257 socioeconomic status indicators (e.g., Canadian Marginalization Index for dissemination area) to  
258 fully capture the variation in socioeconomic status among cohort participants, which is a major  
259 source of residual confounding. We also included individual behavior indicators like dietary and  
260 exercise patterns, which are strong risk factors for mortality, precede the exposure, and might  
261 share common unmeasured causes with the exposure, even though they might not directly cause  
262 the exposure.<sup>50</sup> To note, in the setting when only time-fixed covariates were used, we could  
263 estimate marginal adjusted survival curves directly using outputs from this pooled logistic model  
264 by predicting the probability of death standardized to the distributions of covariates under the  
265 intervention of interest (e.g., setting the baseline level of exposure to a specific value while  
266 keeping all baseline covariates the same as observed for all participants).<sup>19,51</sup> However, in our  
267 study setting of time-varying covariates and time-to-event outcome, we also need to model time-  
268 varying covariates (including PM<sub>2.5</sub>) so that we could simulate time-varying covariates at all  
269 follow-up years for all participants, especially for periods after participants’ death.<sup>28,29</sup>



270 In Step 2, we modeled the time-varying covariates (including PM<sub>2.5</sub>) using linear regressions  
271 while including variables such as previous-year value of the covariate of interest, baseline  
272 characteristics, same-year values of time-varying covariates set to occur before the covariate of  
273 interest, and quadratic function of time. The choice of independent variables in covariate models  
274 are based on substantive knowledge as summarized in the simplified directed acyclic graph  
275 (Figure S1). We summarized the list of all covariates in Table 1 and the specific forms of  
276 covariates included in covariate models in Table 2. We set the sequence of time-varying  
277 covariates as community size, income, immigration and visible minority, material resources,  
278 households and dwellings, age and labour force and long-term exposure to PM<sub>2.5</sub>. Since previous  
279 studies using different cycles of CCHS found a supra-linear PM<sub>2.5</sub>-mortality association,<sup>2,43,52,53</sup>  
280 we used natural logarithm transformed long-term exposure to PM<sub>2.5</sub> as the independent variable  
281 in both the outcome and covariate model in the main analysis.

282 In Step 3, we simulated new datasets based on the intervention strategies. For each intervention,  
283 we randomly sampled 10,000 subjects from the cohort with replacement (i.e., Monte Carlo  
284 sampling) and created an empty dataset of all sampled subjects for all follow-up years till the end  
285 of period of interest (normally the end of follow-up as in this study but extrapolation is possible  
286 with extra assumptions). We only simulated new datasets for 10,000 subjects instead of the  
287 number of participants in study cohorts (~60,000 participants in each cohort) to save  
288 computation time and similar practice was conducted before with smaller cohort.<sup>29</sup> Next, we  
289 assigned the baseline values of all covariates (values of baseline covariates and values of time-  
290 varying covariates at start of follow-up) in each simulated dataset to the same as its original  
291 dataset, then altered the relevant covariate values based on the intervention strategy (e.g., setting  
292 the baseline long-term exposure to PM<sub>2.5</sub> to 5 µg/m<sup>3</sup> if it is higher than 5 µg/m<sup>3</sup> in the threshold  
293 intervention of 5 µg/m<sup>3</sup> but could include other covariates if needed). Last, we simulated time-  
294 varying covariates at each year after baseline based on their history with covariate models  
295 estimated in the second step and altered the covariates based on the intervention strategy.

296 In Step 4, with the simulated datasets and outcome model from the first step, we calculated for  
297 each subject the probability of dying during each year conditioning on surviving to the beginning  
298 of this year, standardized to the distribution of the confounders and long-term exposure to PM<sub>2.5</sub>  
299 under the intervention strategies, regardless of their observed outcomes. Next, we calculated for  
300 each subject the cumulative mortality risk at each year as the cumulative sum of the  
301 abovementioned conditional probability of mortality times the probability of surviving till the  
302 beginning of the time interval. The estimated cumulative mortality risk at each year is the average  
303 of estimates from all subjects for all hypothetical interventions. We also calculated the absolute  
304 difference in cumulative mortality risk and percentage change in cumulative mortality risk with  
305 estimated cumulative mortality risk from natural course as reference.

306 Besides, we calculated the 95% confidence intervals (CI) for all estimates using standard errors  
307 from 200 bootstrap iterations.<sup>54</sup> In each iteration, we randomly sampled the same number of  
308 participants as in the original cohort with replacement and ran the four steps described above to  
309 calculate cumulative mortality risks under intervention strategies. We chose this number of  
310 iteration because we were constrained by available computational resources (>1h of

311 computational time for each bootstrap iteration), and the original application of parametric g-  
312 computation in time-varying covariates and time-to-event setting used the same number.<sup>29</sup> Future  
313 studies with more computational resources might consider larger number of bootstrap iteration.

#### 314 *Sensitivity analyses*

315 To test the robustness of our results to model misspecification, we considered a number of  
316 different model specifications for both outcome and covariate models including: 1) reordering  
317 the sequence of time-varying covariates in covariate models by moving age and labour force to  
318 before the other Canadian Marginalization Index, moving income to after Canadian  
319 Marginalization Index, and moving PM<sub>2.5</sub> to the first place among all covariates; 2) extending the  
320 extent of history modeled by including previous year and two-year previous values of all the  
321 time-varying covariates in the covariate models other than just the previous-year value of the  
322 covariate of interest; and 3) including time-varying covariates other than long-term PM<sub>2.5</sub> as  
323 categorical in the outcome model and using the multinomial logistic model for them in covariate  
324 model instead of modeling them as continuous with bounds using linear model (see Table 2 for  
325 details of model specifications for each time-varying covariates in main analysis). We also  
326 visually evaluated the simulated and observed adjusted survival curves and histories of  
327 covariates under no intervention in the main analysis as a heuristic check of model  
328 misspecification.<sup>27</sup>

329 Next, to facilitate comparison with previous studies, we used long-term PM<sub>2.5</sub> in original scale in  
330 all models as sensitivity analysis, which assumed the same log-linear PM<sub>2.5</sub>-mortality association  
331 used in other cohorts<sup>4,7</sup> instead of the supra-linear one supported by previous studies of different  
332 cycles of the CCHS cohort.<sup>2,43,52,53</sup> Besides, we also ran a Cox-proportional hazard model with  
333 the same specification as the outcome model in our main analysis except that we included no  
334 time variable and used long-term PM<sub>2.5</sub> in original scale, which assumed a log-linear PM<sub>2.5</sub>-  
335 mortality association.

336 Last, since most deaths occurred among older individuals and age could modify the health  
337 impact of long-term exposure to PM<sub>2.5</sub>, we conducted a subset analysis restricted to cohort  
338 participants aged  $\geq 65$  years at the time of enrollment. Since it took up to 24 hours to run one  
339 round of sensitivity analysis without bootstrapping, we were unable to perform bootstrapping to  
340 calculate CIs for sensitivity analyses due to computational constraints and did not present  
341 variances for our estimates. We pooled cycle-specific estimates from sensitivity analyses by  
342 averaging the estimates in each cycle. All analyses were done in R version 4.0.5<sup>55</sup> with the  
343 “gfoRmula” package.<sup>49</sup> The R code to replicate these analyses and a simulated dataset are  
344 available at the following link: [https://github.com/suthlam/cchs\\_g\\_computation.git](https://github.com/suthlam/cchs_g_computation.git).

## 345 **Results**

346 We observed 6,475 (10.4%), 6,525 (10.5%), and 6,135 (9.2%) non-accidental deaths in the 11  
347 years of follow-up starting from 2005 among the three cycles of CCHS cohorts of 62,365, 62,380,  
348 and 66,385 participants, respectively (Table 1). The three cycle cohorts were comparable in all  
349 descriptive statistics (Table 1). Without any hypothetical intervention, the observed average  
350 long-term exposure to PM<sub>2.5</sub> in three cycles of our cohort decreased slightly from  $6.4 \pm 2.2$

351  $\mu\text{g}/\text{m}^3$ ,  $6.5 \pm 2.3 \mu\text{g}/\text{m}^3$ ,  $6.5 \pm 2.3 \mu\text{g}/\text{m}^3$  in 2005 to  $5.8 \pm 2.0 \mu\text{g}/\text{m}^3$ ,  $6.0 \pm 2.0 \mu\text{g}/\text{m}^3$ , and  $6.0 \pm$   
352  $2.0 \mu\text{g}/\text{m}^3$  in 2015, respectively (Table 1).

353 All hypothetical intervention strategies explored in this study led to lower 11-year cumulative  
354 mortality risks than the estimated value under a natural course without intervention, 102.5 per  
355 1000 participants (95% confidence interval (CI): 100.3 to 104.8 per 1000 participants). The  
356 reductions in 11-year cumulative mortality risks from the natural course were 0.20 per 1000  
357 participants (95% CI: 0.06 to 0.34 per 1000 participants) under the threshold of  $8.8 \mu\text{g}/\text{m}^3$ , 0.63  
358 per 1000 participants (95% CI: 0.18 to 1.07 per 1000 participants) under the threshold of  $7.04$   
359  $\mu\text{g}/\text{m}^3$ , 1.87 per 1000 participants (95% CI: 0.53 to 3.21 per 1000 participants) under the  
360 threshold of  $5 \mu\text{g}/\text{m}^3$ , 3.08 per 1000 participants (95% CI: 0.85 to 5.31 per 1000 participants)  
361 under the threshold of  $4 \mu\text{g}/\text{m}^3$ , 1.68 per 1000 participants (95% CI: -0.15 to 3.51 per 1000  
362 participants) under the relative reduction of 5% per interval, and 3.40 per 1000 participants (95%  
363 CI: -0.23 to 7.03 per 1000 participants) under the relative reduction of 10% per interval. To note,  
364 the reduction in 11-year cumulative mortality risks could also be interpreted as the number of  
365 deaths that would have been prevented if the intervention was employed instead of maintaining  
366 status quo. Changes in relative scale showed similar pattern (Table 3). To fulfill the four  
367 threshold intervention strategies, averages of 18.7%, 38.3%, 72.0% and 91.4% of subjects  
368 experienced change in their natural course exposure every year, respectively, while 100% had  
369 their exposure changed under the two relative reduction intervention strategies (Table 3). The  
370 corresponding reductions in average simulated  $\text{PM}_{2.5}$  from the start of follow-up to the end of  
371 year 11 ranged from 0.13 to  $1.87 \mu\text{g}/\text{m}^3$  for threshold intervention strategies, and 1.25 to  $2.18$   
372  $\mu\text{g}/\text{m}^3$  for relative reduction intervention strategies (Table 3). Across all strategies, we observed  
373 steady expansions in differences of yearly cumulative mortality risks between the natural course  
374 and other strategies until the 7<sup>th</sup> year of follow-up, after which the differences remain constant  
375 and shrink during the last year of follow-up (Figure 2 with numeric results in Table S2). In the  
376 main analysis, we pooled estimates of yearly cumulative mortality risks across cycles using  
377 random-effect meta-regression and pooled estimates of differences (absolute and relative scale)  
378 in cumulative mortality risks using fixed-effect meta-regression. Cycle-specific results with  
379 corresponding  $I^2$  values are summarized in Figure S2 with numeric results in Table S3.

380 Heuristic checks of model fitting in the main analysis support the robustness of our estimates: 1)  
381 the cumulative mortality risk estimated by parametric g-computation under the natural course  
382 closely tracked the value observed (Figure S3); and 2) the observed mean values of all time-  
383 varying covariates were similar to those simulated under the natural course over time (Figure S3).  
384 To note, since participants had no time-varying covariates recorded after their death while we  
385 simulated participants' time-varying covariates for all years, differences between observed and  
386 simulated covariates are expected, especially later in the study period. Furthermore, sensitivity  
387 analyses with different model specifications (different sequence of time-varying covariate, extent  
388 of history modeled, and parametrization of time-varying confounders) resulted in similar  
389 estimates as the main analysis (Figure 3, numeric results in Table S4).

390 When assuming a log-linear  $\text{PM}_{2.5}$ -mortality association in the sensitivity analysis (compared to  
391 the supra-linear association assumed in main analysis by log-transforming the exposure),

392 reductions in 11-year cumulative mortality risks comparing other intervention strategies to the  
393 natural course ranged from 0.01 per 1000 participants to 1.65 per 1000 participants, slightly  
394 smaller than main analysis assuming a supra-linear PM<sub>2.5</sub>-mortality association (log-transformed  
395 PM<sub>2.5</sub> used as exposure in modeling) (Table S4). The Cox model assuming a log-linear PM<sub>2.5</sub>-  
396 mortality association found 15.6% (95% CI: 4.0 to 28.5%) increase in hazard of death per 10  
397 µg/m<sup>3</sup> increase in PM<sub>2.5</sub>. When focusing on cohort participants ≥65 years at the start of follow-up,  
398 reductions in 11-year cumulative mortality risks comparing other intervention strategies to the  
399 natural course ranged from 0.49 per 1000 participants to 7.07 per 1000 participants (Table S4),  
400 which is larger than the main analysis using the general population ≥35 years.

## 401 **Discussion**

402 In this study, we applied the parametric g-computation as an analytical alternative that is  
403 particularly valuable for air pollution epidemiological research, especially for evaluating specific  
404 intervention strategies. With application in a large Canadian cohort, we demonstrated how to  
405 incorporate consideration of complex time structure in the data and how to calculate causally  
406 interpretable cumulative risk estimates over the follow-up time (i.e., adjusted survival curves)  
407 with parametric g-computation. We described that any intervention further reducing the long-  
408 term exposure to PM<sub>2.5</sub> would reduce the cumulative mortality risk, even in a region with  
409 relatively low levels of ambient PM<sub>2.5</sub>. Such reduction in cumulative risk increased over time and  
410 flattened towards the end of follow-up on both relative and absolute scales. The older population  
411 also experienced greater benefits from the explored hypothetical intervention strategies than the  
412 general population.

413 Numerous observational studies found positive associations between long-term exposure to  
414 PM<sub>2.5</sub> and non-accidental mortality. A meta-analysis reported a pooled effect estimate of 6% (95%  
415 CI: 4 to 8%) increase in hazard of death per 10 µg/m<sup>3</sup> increase in PM<sub>2.5</sub> (HR-1).<sup>5</sup> A recent study  
416 in a similar Canadian cohort from 2000 to 2012 found 11% (95% CI: 4 to 18%) increase in  
417 hazard of non-accidental death per 10 µg/m<sup>3</sup> increase in chronic exposure to PM<sub>2.5</sub> with a Cox  
418 proportional hazard model.<sup>2</sup> Our sensitivity analysis using Cox model without time-varying  
419 coefficients found similar numeric results [15.6% (95% CI: 4.0 to 28.5%)]. Although we can't  
420 directly compare our estimates from the main analysis to previous results given the difference in  
421 interventions explored, the consistent reductions in cumulative mortality risk over follow-up time  
422 across intervention strategies when compared to natural course in this study lend further support  
423 to previous findings that PM<sub>2.5</sub> is detrimental to health even at levels below current standards.  
424 For example, we identified a 0.19% (95% CI: 0.05 to 0.33%) decrease in 11-year cumulative  
425 mortality risk comparing the hypothetical intervention strategy with threshold of 8.8 µg/m<sup>3</sup> to  
426 natural course, which provided evidence of health benefits from policies that further reduce the  
427 air pollution level to below current Canada standard of 8.8 µg/m<sup>3</sup>, which is lower than the 12  
428 µg/m<sup>3</sup> standard of U.S. explored by previous studies.<sup>4,9</sup> To facilitate comparison with previous  
429 studies assuming a log-linear PM<sub>2.5</sub>-mortality association, we included sensitivity analysis using  
430 PM<sub>2.5</sub> on the normal scale and found reduced cumulative mortality risks in all hypothetical  
431 interventions compared to maintaining status quo but the numeric values are smaller than those  
432 in the main analysis. The observed difference in the numeric values of analysis assuming log-  
433 linear association and analysis assuming supra-linear association is a combination of difference

434 in how the exposure-response relationship is modeled and how the exposure model performs.  
435 However, given the existing evidence in Canadian cohorts and similarity between observed  
436 survival curve and estimated survival curve using parametric g-computation under no  
437 intervention in the main analysis,<sup>2,43,52,53</sup> we have confidence in the validity of results assuming a  
438 supra-linear association.

439 More importantly, we demonstrated how to incorporate more flexibilities in simulating real  
440 world interventions with g-computation in this study and provide intuitive estimates for benefits  
441 of such interventions. Taking the hypothetical intervention strategy with threshold of the current  
442 Canadian Ambient Air Quality Standards as an example, the average long-term exposure to  
443 PM<sub>2.5</sub> in 2005 was around 6.5 µg/m<sup>3</sup>, below the standard of 8.8 µg/m<sup>3</sup>. However, some cohort  
444 participants were exposed to PM<sub>2.5</sub> levels higher than 8.8 µg/m<sup>3</sup> during some years of follow-up  
445 and our hypothetical intervention only affected these subject-years by reducing their exposure to  
446 8.8 µg/m<sup>3</sup>, which represented a three-cycle average of 18.7% of subjects across all years. Since  
447 the observed PM<sub>2.5</sub> levels decreased without any intervention in our study, fewer subjects were  
448 directly intervened on in later years under threshold intervention strategies, which explained the  
449 flattened differences in cumulative risks between intervention strategies in later years. However,  
450 all time-varying covariates after the intervention on PM<sub>2.5</sub> would change accordingly due to the  
451 intervention on PM<sub>2.5</sub>, thus influencing future outcomes as well. Such dynamic intervention  
452 strategy incorporated considerations of people who could be intervened on and are more realistic  
453 than the static intervention strategy commonly employed in health burden estimation with  
454 traditional exposure-response function, which sets change in exposure at a fixed value for all  
455 individuals throughout the period of interest. Besides, although we only provided differences in  
456 cumulative risk as compared to the natural course, it is easy to estimate differences between any  
457 two hypothetical intervention strategies.

458 Furthermore, the estimated cumulative risks over the follow-up time by g-computation (i.e.,  
459 adjusted survival curves) and corresponding comparisons of values between different  
460 hypothetical interventions provided clearer causal interpretation and more information than a  
461 single HR or period-specific HRs, which is generally used in air pollution studies (Table S1). In  
462 the context of health impacts from chronic exposure to PM<sub>2.5</sub>, HR can change over time since the  
463 toxicity of PM<sub>2.5</sub> (e.g., chemical composition of PM<sub>2.5</sub>) and susceptibility of population to PM<sub>2.5</sub>  
464 could change over time, while standard Cox model assumed constant HR and period-specific HR  
465 from extensions of Cox had built-in bias that led to ambiguity in causal interpretation.<sup>56</sup> On the  
466 other hand, the cumulative mortality risks estimated in this study avoided such ambiguity in  
467 interpretation while also demonstrating the change of intervention effect over time.<sup>19</sup> Also,  
468 obtaining the casually interpretable absolute differences in cumulative risks between hypothetical  
469 intervention strategies over time could be particularly helpful for comparing different scenarios  
470 regarding public health benefits.<sup>57</sup> Besides, if policies affecting air pollutants such as PM<sub>2.5</sub> could  
471 further affect prognostic covariates influencing both future PM<sub>2.5</sub> levels and health outcomes  
472 (commonly referred to as exposure-confounder feedback), traditional regression methods based  
473 on adjustment in a multivariable model would fail and lead to biased estimates for the effect  
474 while g-computation is designed to particularly solve this problem.<sup>24,26,58</sup> An example of such  
475 exposure-confounder feedback is that people might move due to high level of PM<sub>2.5</sub> in their

476 current community and subsequently change the characteristics of their community of residence,  
477 while the characteristics of their current community also affect the level of  $PM_{2.5}$  and probability  
478 of death. Controlling for such community characteristics is necessary for confounding control  
479 but doing so with traditional methods will remove the indirect effect mediated through  
480 community characteristics and introduce collider-stratification bias<sup>59</sup> if any unmeasured  
481 confounder of the community characteristics and death exists.<sup>58</sup> However, making moving  
482 decision based on community level of  $PM_{2.5}$  is unlikely in countries with relatively low  $PM_{2.5}$   
483 like Canada and exposure-confounder feedback is expected to be negligible in our study, but it is  
484 possible in countries with higher  $PM_{2.5}$ .

485 This study has a few limitations that need to be acknowledged. First, parametric g-computation  
486 can only account for measured confounders and lack of conditional exchangeability (i.e., residual  
487 confounding) might exist due to unmeasured confounders or measurement errors of existing  
488 confounders, regardless of our extensive list of confounders considered based on substantive  
489 knowledge on risk factors of  $PM_{2.5}$  exposure and death (Figure S1). For example, we assumed  
490 many individual behavior, demographic, and socioeconomic variables to be time-invariant (e.g.,  
491 employment status and body mass index) due to data availability (these variables were only  
492 reported once at the time of enrollment) while they likely changed over the study period.  
493 However, we also included time-varying individual income and community demographic and  
494 socioeconomic variables in our models, which mitigated the concern of residual confounding  
495 from these baseline variables. Besides, like other cohort studies of air pollution, we utilized  
496 postal-code level  $PM_{2.5}$  levels as surrogates for individual exposure to  $PM_{2.5}$ , which might  
497 introduce exposure misclassification.<sup>60</sup> Recent studies showed that such bias may either not bias  
498 effect estimates<sup>61</sup> or bias these estimates towards the null,<sup>62</sup> making our estimates more  
499 conservative.

500 Second, although we explored different model specifications and found similar results in  
501 sensitivity analyses, we cannot rule out the possibility of model misspecification, especially  
502 given the fact that parametric g-computation requires correct model specification of both the  
503 outcome and covariate models to achieve unbiased results. Notably, McGrath et al. demonstrated  
504 that the “g-null paradox”, a form of model misspecification that was traditionally believed to  
505 cause false rejection of null hypothesis under sharp null effect,<sup>63</sup> is unavoidable in parametric g-  
506 computation even when the sharp null hypothesis does not hold, and recommended more flexible  
507 models in analysis.<sup>64</sup> However, the magnitude of bias depends on the extent of exposure-  
508 confounder feedback and time-varying confounding. In the context of this study, we would  
509 expect relatively small exposure-confounder feedback thus less concern over g-null paradox.  
510 Also, consistent results from sensitivity analysis using more flexible models supported the  
511 robustness of our results.

512 Third, being an active research field, the existing R package for parametric g-computation does  
513 not support features like incorporation of spline functions of time-varying covariates in the  
514 model, direct estimation of randomized interventional strategy,<sup>65</sup> model fit checking with  
515 significance tests, or bias analysis. However, the current package provided enough flexibility for  
516 our study to employ flexible models that mitigated the possibility of violating the positivity

517 assumption via model extrapolation. For example, we were able to incorporate flexible supra-  
518 linear  $PM_{2.5}$ -mortality association and temporal changes in the conditional probability of  
519 mortality in the estimation as supported by previous studies, incorporate restricted cubic spline  
520 function of baseline age in all models, and conduct sensitivity analysis with categorical time-  
521 varying confounders. Besides, although not relevant to our cohort since we had the all-cause  
522 mortality as the outcome and no loss to follow-up, right censoring and informative loss to  
523 follow-up could be handled by parametric g-computation and the existing R package by  
524 simulating data on participants as though they had not been censored.<sup>66</sup> It is worth mentioning  
525 that other methods could also handle the methodological considerations that g-computation  
526 addresses—consideration of complex time structure and reporting of adjusted survival curves—  
527 and have been applied in air pollution epidemiological research, including Inverse Probability of  
528 Treatment Weighting (IPTW).<sup>6</sup> Furthermore, some recent approaches such as the targeted  
529 maximum likelihood estimation can also be used to directly evaluate individualized dynamic  
530 intervention strategies of continuous exposures and provide doubly robust estimates that are less  
531 vulnerable to model misspecification with valid statistical inference when data-  
532 adaptive/machine-learning methods are incorporated.<sup>67,68</sup>

533 Finally,  $PM_{2.5}$  is a mixture of varying chemical components and toxicity and is generated from  
534 different sources of emissions (e.g. traffic, industries, and wildfires). In this paper, we focused on  
535  $PM_{2.5}$  without distinguishing the  $PM_{2.5}$  composition nor the sources of emissions. This  
536 potentially violated the consistency assumption (i.e. no-multiple-versions-of-treatment and all  
537 exposed individuals received the same version of treatment). If there is any unmeasured  
538 confounder of the “version of treatment” and outcome relationship, the effect estimates could be  
539 biased according to a recent simulation study, with magnitude and direction of such bias  
540 depending on the strength of confounding.<sup>69</sup> In future studies, it would be important to consider  
541 the possible differential toxicity of  $PM_{2.5}$  components and define hypothetical interventions  
542 targeting different sources of  $PM_{2.5}$  emissions separately.

## 543 **Conclusion**

544 This study demonstrated the benefits of using parametric g-computation as an analytical  
545 alternative for air pollution epidemiological research, especially for evaluating the potential  
546 effects of realistic dynamic intervention strategies in the time-to-event setting with time-varying  
547 exposure and confounders. With a large Canadian cohort, we calculated causally interpretable  
548 cumulative risk estimates over the follow-up time and corresponding benefits compared to  
549 maintaining status quo. We also found that any intervention further reducing the long-term  
550 exposure to  $PM_{2.5}$  would reduce the cumulative mortality risk from maintaining the status quo,  
551 even in a population already exposed to relatively low levels of ambient  $PM_{2.5}$ .

Table 1. Descriptive statistics for participants of the Canadian Community Health Survey cohort at the start of follow-up (2005) by cycle.

| Characteristics                                          | Cycle 2000/2001    | Cycle 2003         | Cycle 2005         |
|----------------------------------------------------------|--------------------|--------------------|--------------------|
| Cohort size                                              | 62365 <sup>a</sup> | 62380 <sup>a</sup> | 66835 <sup>a</sup> |
| Non-accidental deaths (%)                                | 6475 (10.4)        | 6525 (10.5)        | 6135 (9.2)         |
| <b>Time-fixed covariates</b>                             |                    |                    |                    |
| Age [mean (SD)], years                                   | 52.1 (13.4)        | 52.1 (14.4)        | 50.9 (14.9)        |
| Sex, %                                                   |                    |                    |                    |
| Female                                                   | 45.2               | 45.9               | 46.2               |
| Male                                                     | 54.8               | 54.1               | 53.8               |
| BMI, %                                                   |                    |                    |                    |
| Normal weight (18.5–24.9)                                | 37.5               | 32.2               | 32.0               |
| Overweight (25.0–29.9)                                   | 36.7               | 39.8               | 39.8               |
| Obese 1 (30.0–34.9)                                      | 16.4               | 19.1               | 18.9               |
| Obese 2 ( $\geq 35$ )                                    | 6.8                | 8.1                | 8.4                |
| Underweight ( $< 18.5$ )                                 | 2.6                | 0.8                | 0.9                |
| Marital status, %                                        |                    |                    |                    |
| Married or common-law                                    | 65.9               | 64.3               | 63.0               |
| Separated, widowed, or divorced                          | 19.6               | 20.8               | 20.8               |
| Single                                                   | 14.5               | 14.9               | 16.2               |
| Immigrant status, %                                      |                    |                    |                    |
| Immigrant                                                | 10.7               | 11.3               | 11.6               |
| Time lived in Canada among immigrants [mean (SD)], years | 37.4 (13.3)        | 36.8 (13.9)        | 35.7 (14.1)        |
| Non-immigrant                                            | 89.3               | 88.7               | 88.4               |
| Visible minority status, %                               |                    |                    |                    |
| Visible minority                                         | 5.4                | 6.3                | 4.4                |
| Not a visible minority                                   | 94.6               | 93.7               | 95.6               |
| Indigenous status, %                                     |                    |                    |                    |
| Indigenous                                               | 1.8                | 2.3                | 0 <sup>b</sup>     |
| Non-indigenous                                           | 98.2               | 97.7               | 100                |
| Smoking status, %                                        |                    |                    |                    |
| Never smoker                                             | 26.8               | 27.6               | 29.0               |
| Occasional smoker                                        | 44.5               | 47.7               | 47.1               |
| Smoke under 10 cigarettes/day                            | 3.8                | 4.3                | 4.2                |
| Smoke 11-20 cigarettes/day                               | 6.0                | 5.6                | 5.7                |
| Smoke 20+ cigarettes/day                                 | 10.9               | 9.0                | 8.6                |
| Former smoker                                            | 8.0                | 5.8                | 5.4                |
| Alcohol consumption, %                                   |                    |                    |                    |
| Never drinker                                            | 4.4                | 4.2                | 4.1                |
| Occasional drinker                                       | 13.1               | 13.7               | 13.6               |
| Regular drinker, binge unknown                           | 20.3               | 18.7               | 18.2               |
| Regular, non-binge drinker                               | 29.4               | 31.0               | 30.4               |
| Regular, binge drinker                                   | 26.9               | 26.7               | 27.3               |
| Former drinker                                           | 5.9                | 5.7                | 6.4                |
| Daily consumption of fruits and vegetables, %            |                    |                    |                    |
| Under 5 servings/day                                     | 64.7               | 59.6               | 29.9               |
| 5–10 servings/day                                        | 32.4               | 37.0               | 19.6               |
| 10+ servings/day                                         | 2.9                | 3.4                | 1.6                |
| Choose to not answer <sup>c</sup>                        | NA                 | NA                 | 48.9               |
| Employment status, %                                     |                    |                    |                    |
| Employed                                                 | 66.6               | 62.3               | 61.8               |



|                                                                    |      |      |      |
|--------------------------------------------------------------------|------|------|------|
| Not employed                                                       | 2.6  | 2.6  | 2.3  |
| Not in work force                                                  | 30.8 | 35.1 | 35.9 |
| Education, %                                                       |      |      |      |
| No high school diploma                                             | 24.1 | 22.4 | 20.6 |
| High school                                                        | 18.9 | 18.0 | 15.4 |
| Any post-secondary                                                 | 42.0 | 42.5 | 46.1 |
| University                                                         | 15.0 | 17.1 | 17.9 |
| Leisure time physical activity, %                                  |      |      |      |
| Active                                                             | 21.2 | 24.0 | 23.4 |
| Moderately active                                                  | 25.4 | 26.4 | 26.7 |
| Inactive                                                           | 53.4 | 49.6 | 49.9 |
| Urban form, %                                                      |      |      |      |
| Active urban core                                                  | 6.2  | 7.0  | 7.0  |
| Transit reliant suburb                                             | 3.9  | 4.3  | 4.6  |
| Auto reliant suburb or no data                                     | 26.5 | 29.4 | 29.3 |
| Exurb                                                              | 4.8  | 5.0  | 4.8  |
| Non-CMA/CA <sup>d</sup>                                            | 58.6 | 54.3 | 54.3 |
| Airshed, %                                                         |      |      |      |
| Western                                                            | 12.0 | 10.7 | 10.4 |
| Prairie                                                            | 16.0 | 14.9 | 13.5 |
| Western Central                                                    | 9.1  | 8.6  | 7.8  |
| Southern Atlantic                                                  | 17.2 | 14.6 | 17.3 |
| East Central                                                       | 44.1 | 49.3 | 48.9 |
| Northern                                                           | 1.6  | 1.9  | 2.1  |
| <b>Time-varying covariates</b>                                     |      |      |      |
| Community size, %                                                  |      |      |      |
| Population > 1,500,000                                             | 13.5 | 14.7 | 16.9 |
| Population 500,000-1,499,999                                       | 10.3 | 11.9 | 10.4 |
| Population 100,000-499,999                                         | 20.4 | 21.0 | 19.7 |
| Population 30,000-99,999                                           | 14.7 | 13.2 | 12.4 |
| Population 10,000-29,999                                           | 7.4  | 7.0  | 7.5  |
| Non-CMA/CA <sup>d</sup>                                            | 33.7 | 32.2 | 33.1 |
| Annual family income quintile, %                                   |      |      |      |
| 1 <sup>st</sup> quintile (lowest)                                  | 19.0 | 19.1 | 19.3 |
| 2 <sup>nd</sup> quintile                                           | 19.7 | 19.3 | 19.1 |
| 3 <sup>rd</sup> quintile                                           | 19.9 | 19.8 | 19.5 |
| 4 <sup>th</sup> quintile                                           | 20.7 | 20.4 | 20.8 |
| 5 <sup>th</sup> quintile (highest)                                 | 20.7 | 21.4 | 21.3 |
| Canadian marginalization index—age and labour force, %             |      |      |      |
| 1 <sup>st</sup> quintile (lowest marginalization)                  | 14.4 | 15.3 | 14.8 |
| 2 <sup>nd</sup> quintile                                           | 13.5 | 13.6 | 13.7 |
| 3 <sup>rd</sup> quintile                                           | 13.7 | 13.9 | 14.1 |
| 4 <sup>th</sup> quintile                                           | 22.2 | 20.9 | 20.8 |
| 5 <sup>th</sup> quintile (highest marginalization)                 | 36.2 | 36.3 | 36.6 |
| Canadian marginalization index—material resources, %               |      |      |      |
| 1 <sup>st</sup> quintile (lowest marginalization)                  | 15.5 | 15.7 | 15.2 |
| 2 <sup>nd</sup> quintile                                           | 16.8 | 16.9 | 17.0 |
| 3 <sup>rd</sup> quintile                                           | 20.8 | 20.8 | 20.2 |
| 4 <sup>th</sup> quintile                                           | 18.1 | 17.8 | 17.0 |
| 5 <sup>th</sup> quintile (highest marginalization)                 | 28.8 | 28.8 | 30.6 |
| Canadian marginalization index—immigration and visible minority, % |      |      |      |
| 1 <sup>st</sup> quintile (lowest marginalization)                  | 42.6 | 41.4 | 41.8 |
| 2 <sup>nd</sup> quintile                                           | 26.9 | 26.9 | 26.5 |

|                                                                                                                                                            |                           |                           |                           |
|------------------------------------------------------------------------------------------------------------------------------------------------------------|---------------------------|---------------------------|---------------------------|
| 3 <sup>rd</sup> quintile                                                                                                                                   | 17.0                      | 17.3                      | 15.9                      |
| 4 <sup>th</sup> quintile                                                                                                                                   | 8.5                       | 9.0                       | 9.9                       |
| 5 <sup>th</sup> quintile (highest marginalization)                                                                                                         | 5.0                       | 5.4                       | 5.9                       |
| Canadian marginalization index—households and dwellings, %                                                                                                 |                           |                           |                           |
| 1 <sup>st</sup> quintile (lowest marginalization)                                                                                                          | 22.7                      | 21.2                      | 21.7                      |
| 2 <sup>nd</sup> quintile                                                                                                                                   | 28.3                      | 27.7                      | 27.1                      |
| 3 <sup>rd</sup> quintile                                                                                                                                   | 21.0                      | 21.7                      | 21.0                      |
| 4 <sup>th</sup> quintile                                                                                                                                   | 17.3                      | 17.8                      | 17.6                      |
| 5 <sup>th</sup> quintile (highest marginalization)                                                                                                         | 10.7                      | 11.6                      | 11.8                      |
| Average PM <sub>2.5</sub> of previous three years [mean (SD)], µg/m <sup>3</sup>                                                                           | 6.4 (2.2)                 | 6.5 (2.3)                 | 6.5 (2.3)                 |
| Average PM <sub>2.5</sub> of previous three years [median (minimum, 25 <sup>th</sup> percentile, 75 <sup>th</sup> percentile, maximum)], µg/m <sup>3</sup> | 5.9 (1.7, 15.0, 4.6, 7.8) | 6.1 (1.7, 4.7, 8.1, 15.0) | 6.1 (1.6, 4.6, 8.2, 15.0) |

Note: BMI, Body Mass Index; PM<sub>2.5</sub>, particulate matter < 2.5 µm diameter.

<sup>a</sup>Rounded to the nearest 5 or 0 in the last digit to protect privacy

<sup>b</sup>We did not include the indigenous status indicator in models of Cycle 2005.

<sup>c</sup>Consumption of fruit and vegetable was listed with an additional option in Cycle 2005 but not in the other two cycles.

<sup>d</sup>Not categorized as census metropolitan area (CMA) or census agglomeration status (CA) and likely in rural area.

Table 2. Details for covariate formats and model types for both outcome and covariate models in main analysis.

| Variable Name                                                        | Type as independent variable                                                                                                           | Type as dependent variable and corresponding model used    |
|----------------------------------------------------------------------|----------------------------------------------------------------------------------------------------------------------------------------|------------------------------------------------------------|
| <b>Time-fixed covariates</b>                                         |                                                                                                                                        |                                                            |
| Age in 2005 <sup>a</sup>                                             | Restricted cubic spline function with 5 knots                                                                                          | Not predicted                                              |
| Sex                                                                  | Binary                                                                                                                                 | Not predicted                                              |
| BMI                                                                  | 5 categories                                                                                                                           | Not predicted                                              |
| Marital status                                                       | 3 categories                                                                                                                           | Not predicted                                              |
| Immigrant                                                            | An indicator for immigrant and a interaction term between the indicator and a continuous variable for years in Canada among immigrants | Not predicted                                              |
| Visible minority                                                     | Binary                                                                                                                                 | Not predicted                                              |
| Indigenous status                                                    | Binary                                                                                                                                 | Not predicted                                              |
| Smoking status                                                       | 6 categories                                                                                                                           | Not predicted                                              |
| Alcohol consumption                                                  | 6 categories                                                                                                                           | Not predicted                                              |
| Daily consumption of fruit and vegetables                            | 4 categories                                                                                                                           | Not predicted                                              |
| Leisure time physical activity                                       | 3 categories                                                                                                                           | Not predicted                                              |
| Employment status                                                    | 3 categories                                                                                                                           | Not predicted                                              |
| Education attainment                                                 | 4 categories                                                                                                                           | Not predicted                                              |
| Urban form                                                           | 5 categories                                                                                                                           | Not predicted                                              |
| Air shed                                                             | 6 categories                                                                                                                           | Not predicted                                              |
| <b>Time-varying covariates</b>                                       |                                                                                                                                        |                                                            |
| Time                                                                 | Year and quadratic term of Year <sup>b</sup>                                                                                           | Not predicted                                              |
| Community size                                                       | Continuous                                                                                                                             | Bounded normal <sup>c</sup> (1 to 6) and linear regression |
| Annual family income quintile                                        | Continuous                                                                                                                             | Bounded normal (1 to 5) and linear regression              |
| Canadian Marginalization Index for immigration and visible minority  | Continuous                                                                                                                             | Bounded normal (1 to 5) and linear regression              |
| Canadian Marginalization Index for material resources                | Continuous                                                                                                                             | Bounded normal (1 to 5) and linear regression              |
| Canadian Marginalization Index for households and dwellings          | Continuous                                                                                                                             | Bounded normal (1 to 5) and linear regression              |
| Canadian Marginalization Index for age and labour force              | Continuous                                                                                                                             | Bounded normal (1 to 5) and linear regression              |
| Three-year average PM <sub>2.5</sub> concentration with one-year lag | Natural logarithm transformed                                                                                                          | Normal with linear regression                              |

Note: BMI, Body Mass Index; PM<sub>2.5</sub>, particulate matter < 2.5 µm diameter.

<sup>a</sup>In subset analysis restricted to cohort participants older or equal to 65 years, we used restricted cubic spline function with 3 knots for age.

<sup>b</sup>Categorical year was used in the interaction terms between time and the exposure.

<sup>c</sup>Variables with bounded normal category was modeled and simulated by using the standardized value (subtracting the minimum value and dividing by the range) in linear regression. Simulated values that fall outside the observed range are set to the minimum or maximum of the observed range.

Table 3. Summaries of estimated 11-year cumulative mortality risk under different intervention strategies pooled across cycles and differences in estimated risk compared to natural course in relative and absolute scale, and corresponding average simulated PM<sub>2.5</sub> and proportion of subjects with exposure changed for all intervention strategies.

| <b>Intervention strategy</b>        | <b>11-year CMR ( per 1000 participants) (95% CI)</b> | <b>Difference in 11-year CMR ( per 1000 participants) (95% CI)</b> | <b>Percentage change in 11-year CMR (95% CI)</b> | <b>Average percentage of subjects with exposure changed<sup>a</sup></b> | <b>Average simulated PM<sub>2.5</sub> concentration (µg/m<sup>3</sup>)<sup>a</sup></b> |
|-------------------------------------|------------------------------------------------------|--------------------------------------------------------------------|--------------------------------------------------|-------------------------------------------------------------------------|----------------------------------------------------------------------------------------|
| Natural course                      | 102.5 (100.3, 104.8)                                 | Reference                                                          | Reference                                        | 0                                                                       | 5.62                                                                                   |
| Threshold of 8.8 µg/m <sup>3</sup>  | 102.3 (100.1, 104.6)                                 | -0.20 (-0.34, -0.06)                                               | -0.19 (-0.33, -0.05)                             | 18.7                                                                    | 5.49                                                                                   |
| Threshold of 7.04 µg/m <sup>3</sup> | 102.0 (99.7, 104.2)                                  | -0.63 (-1.07, -0.18)                                               | -0.60 (-1.03, -0.17)                             | 38.3                                                                    | 5.21                                                                                   |
| Threshold of 5 µg/m <sup>3</sup>    | 100.9 (98.4, 103.5)                                  | -1.87 (-3.21, -0.53)                                               | -1.79 (-3.11, -0.48)                             | 72.0                                                                    | 4.42                                                                                   |
| Threshold of 4 µg/m <sup>3</sup>    | 99.8 (96.7, 102.9)                                   | -3.08 (-5.31, -0.85)                                               | -2.95 (-5.14, -0.77)                             | 91.4                                                                    | 3.75                                                                                   |
| 5% reduction per interval           | 101.4 (98.6, 104.2)                                  | -1.68 (-3.51, 0.15)                                                | -1.61 (-3.40, 0.17)                              | 100                                                                     | 4.37                                                                                   |
| 10% reduction per interval          | 99.8 (95.6, 103.9)                                   | -3.40 (-7.03, 0.23)                                                | -3.27 (-6.81, 0.28)                              | 100                                                                     | 3.44                                                                                   |

Note: CMR: Cumulative Mortality Risk; PM<sub>2.5</sub>, particulate matter < 2.5 µm diameter.

<sup>a</sup>This is the three-cycle average of the mean value across all years.

Figure 1. Diagram of g-computation with time-to-event outcome and time-varying covariates. Arrow indicates information needed from previous box.

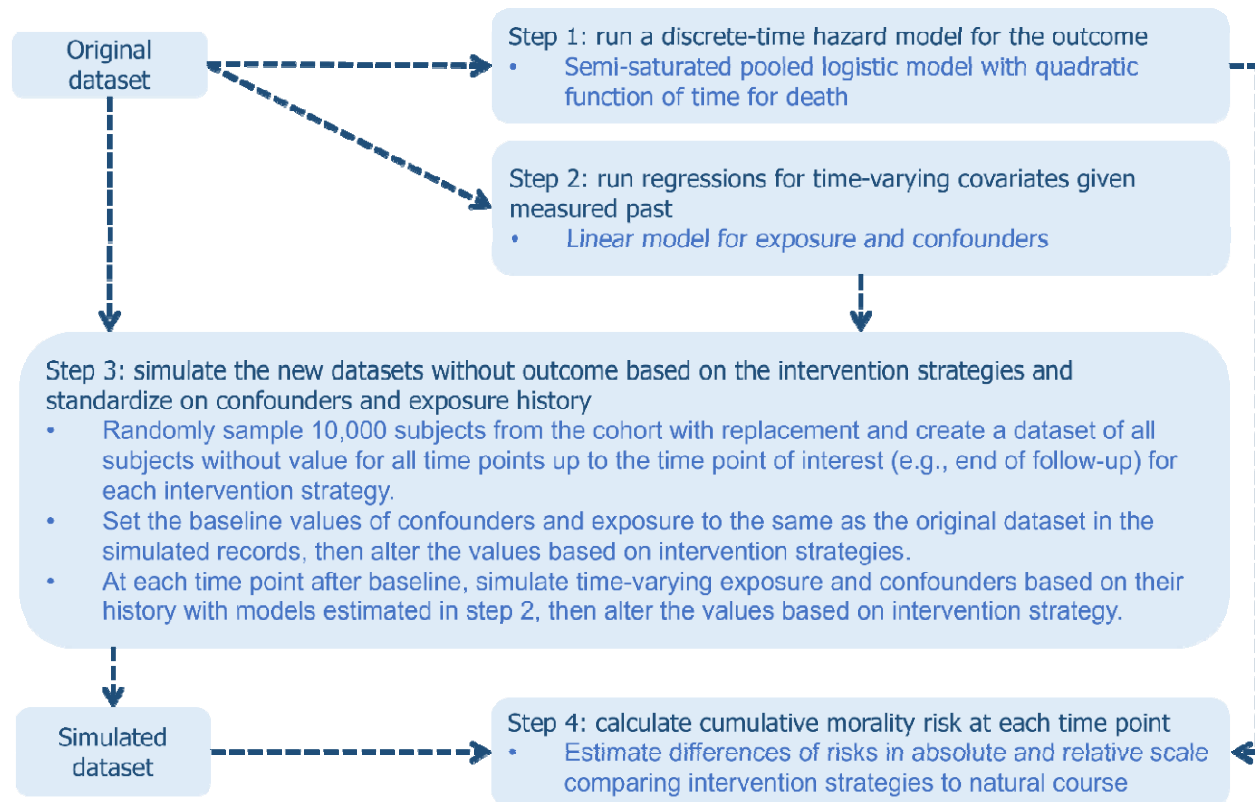

Figure 2. Differences in yearly cumulative mortality risks pooled across cycles comparing different intervention strategies to natural course, with weights equal to the inverse of variance. Numeric results are presented in Table S2.

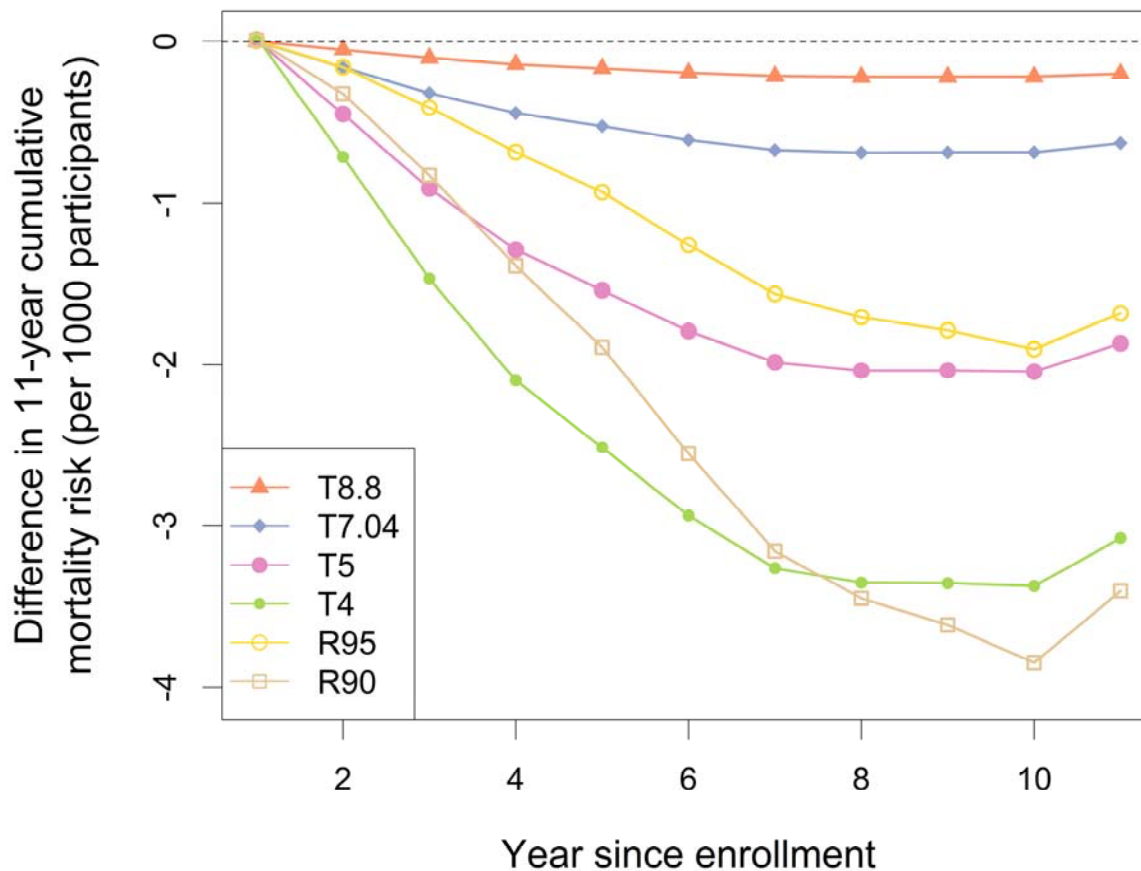

Note: T8.8, threshold value (reduced to threshold value if above) set at the current Canadian Ambient Air Quality Standards for  $\text{PM}_{2.5}$  of  $8.8 \mu\text{g}/\text{m}^3$ ; T7.04: threshold value set at 80% of the current Canadian Ambient Air Quality Standards for  $\text{PM}_{2.5}$  (or  $7.04 \mu\text{g}/\text{m}^3$ ); T5: threshold value set at the new World Health Organization guideline of  $5 \mu\text{g}/\text{m}^3$ ; T4: threshold value set at a  $\text{PM}_{2.5}$  level that was further below the World Health Organization guideline ( $4 \mu\text{g}/\text{m}^3$ ); R90: yearly relative reduction values set at 10% per interval; and R95: yearly relative reduction values set at 5% per interval.

Figure 3. Differences in 11-year cumulative mortality risks comparing different intervention strategies to natural course for main analysis and sensitivity analyses. Numeric results are presented in Table 3 and Table S4.

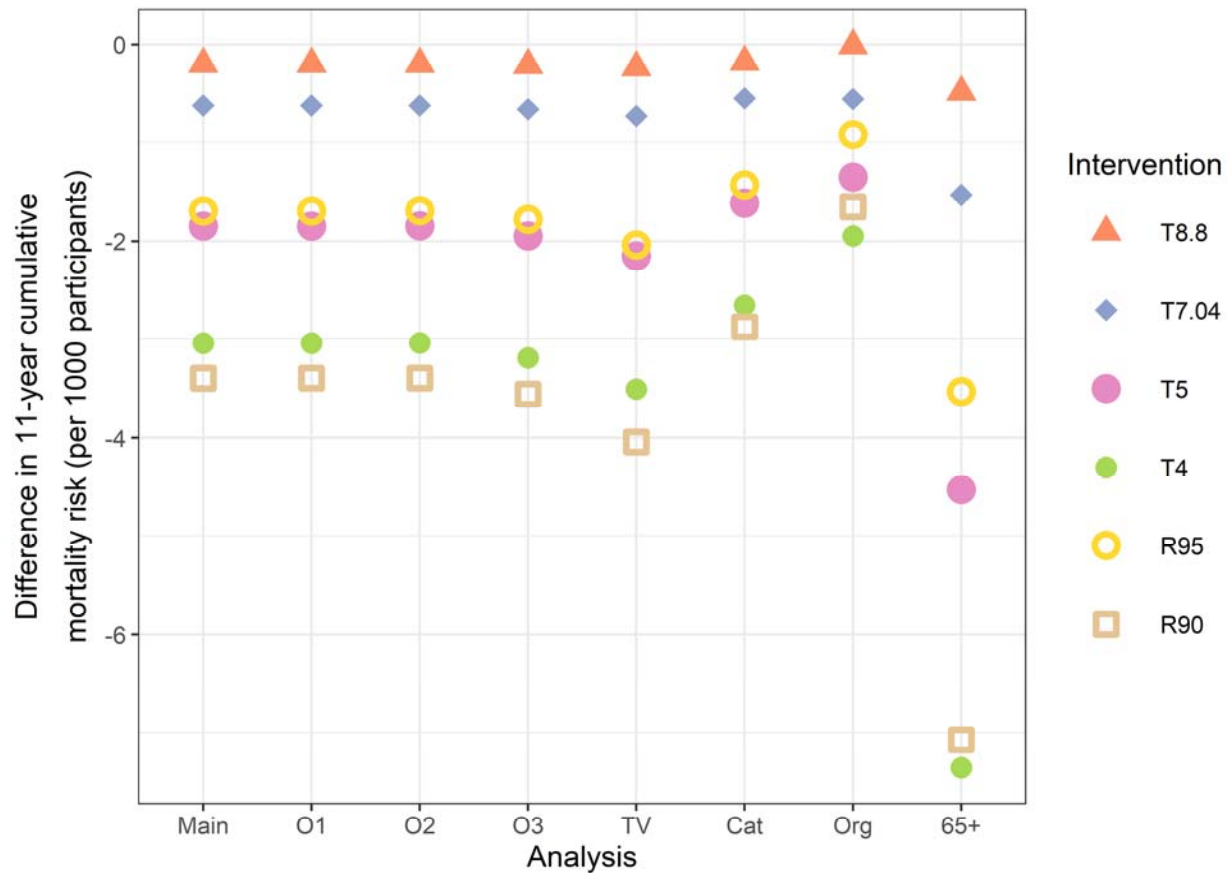

Note: T8.8, threshold value (reduced to threshold value if above) set at the current Canadian Ambient Air Quality Standards for  $PM_{2.5}$  of  $8.8 \mu g/m^3$ ; T7.04: threshold value set at 80% of the current Canadian Ambient Air Quality Standards for  $PM_{2.5}$  (or  $7.04 \mu g/m^3$ ); T5: threshold value set at the new World Health Organization guideline of  $5 \mu g/m^3$ ; T4: threshold value set at a  $PM_{2.5}$  level that was further below the World Health Organization guideline ( $4 \mu g/m^3$ ); R90: yearly relative reduction values set at 10% per interval; R95: yearly relative reduction values set at 5% per interval; O1: placing Canadian Marginalization Index-age and labour force before the other Canadian Marginalization Index in occurring sequence of time-varying covariate; O2: moving income to after Canadian Marginalization Index in occurring sequence of time-varying covariate; O3: moving  $PM_{2.5}$  to the first in occurring sequence of time-varying covariate; TV: adding all time-varying covariates of previous year and two-year previous to covariate model; Cat: including time-varying covariates other than long-term  $PM_{2.5}$  as categorical in outcome model and using multinomial logistic model for them in covariate model; Org: using long-term  $PM_{2.5}$  in original scale in all models; and 65+: subset analysis restricted to cohort participants older or equal to 65 years.

## References

1. Beelen R, Raaschou-Nielsen O, Stafoggia M, et al. Effects of long-term exposure to air pollution on natural-cause mortality: an analysis of 22 European cohorts within the multicentre ESCAPE project. *The Lancet*. 2014;383(9919):785-795. doi:10.1016/S0140-6736(13)62158-3
2. Christidis T, Erickson AC, Pappin AJ, et al. Low concentrations of fine particle air pollution and mortality in the Canadian Community Health Survey cohort. *Environmental Health*. 2019;18(1). doi:10.1186/s12940-019-0518-y
3. Crouse DL, Peters PA, van Donkelaar A, et al. Risk of Nonaccidental and Cardiovascular Mortality in Relation to Long-term Exposure to Low Concentrations of Fine Particulate Matter: A Canadian National-Level Cohort Study. *Environmental Health Perspectives*. 2012;120(5):708-714. doi:10.1289/ehp.1104049
4. Di Q, Wang Y, Zanobetti A, et al. Air pollution and mortality in the Medicare population. *New England Journal of Medicine*. 2017;376(26):2513-2522. doi:10.1056/NEJMoal702747
5. Hoek G, Krishnan RM, Beelen R, et al. Long-term air pollution exposure and cardio-respiratory mortality: a review. *Environmental Health*. 2013;12:43. doi:10.1186/1476-069X-12-43
6. Wu X, Braun D, Schwartz J, Kioumourtzoglou MA, Dominici F. Evaluating the impact of long-term exposure to fine particulate matter on mortality among the elderly. *Science Advances*. Published online June 26, 2020:eaba5692. doi:10.1126/sciadv.aba5692
7. Cesaroni G, Forastiere F, Stafoggia M, et al. Long term exposure to ambient air pollution and incidence of acute coronary events: prospective cohort study and meta-analysis in 11 European cohorts from the ESCAPE Project. *BMJ*. 2014;348:f7412. doi:10.1136/bmj.f7412
8. Yazdi MD, Wang Y, Di Q, et al. Long-Term Association of Air Pollution and Hospital Admissions Among Medicare Participants Using a Doubly Robust Additive Model. *Circulation*. Published online February 22, 2021. doi:10.1161/CIRCULATIONAHA.120.050252
9. Makar M, Antonelli J, Di Q, Cutler D, Schwartz J, Dominici F. Estimating the causal effect of low levels of fine particulate matter on hospitalization. *Epidemiology*. 2017;28(5):627-634. doi:10.1097/EDE.0000000000000690
10. Bi J, D'Souza RR, Rich DQ, et al. Temporal changes in short-term associations between cardiorespiratory emergency department visits and PM2.5 in Los Angeles, 2005 to 2016. *Environmental Research*. 2020;190:109967. doi:10.1016/j.envres.2020.109967
11. Breitner S, Stölzel M, Cyrys J, et al. Short-term mortality rates during a decade of improved air quality in Erfurt, Germany. *Environ Health Perspect*. 2009;117(3):448-454. doi:10.1289/ehp.11711



12. Chen C, Warrington JA, Dominici F, et al. Temporal variation in association between short-term exposure to fine particulate matter and hospitalisations in older adults in the USA: a long-term time-series analysis of the US Medicare dataset. *The Lancet Planetary Health*. 2021;5(8):e534-e541. doi:10.1016/S2542-5196(21)00168-6
13. Dominici F, Peng RD, Zeger SL, White RH, Samet JM. Particulate air pollution and mortality in the United States: did the risks change from 1987 to 2000? *Am J Epidemiol*. 2007;166(8):880-888. doi:10.1093/aje/kwm222
14. Atkinson RW, Mills IC, Walton HA, Anderson HR. Fine particle components and health—a systematic review and meta-analysis of epidemiological time series studies of daily mortality and hospital admissions. *J Expo Sci Environ Epidemiol*. 2015;25(2):208-214. doi:10.1038/jes.2014.63
15. Rohr AC, Wyzga RE. Attributing health effects to individual particulate matter constituents. *Atmos Environ (1994)*. 2012;62:130-152. doi:10.1016/j.atmosenv.2012.07.036
16. Wyzga RE, Rohr AC. Long-term particulate matter exposure: Attributing health effects to individual PM components. *Journal of the Air & Waste Management Association*. 2015;65(5):523-543. doi:10.1080/10962247.2015.1020396
17. Yang Y, Ruan Z, Wang X, et al. Short-term and long-term exposures to fine particulate matter constituents and health: A systematic review and meta-analysis. *Environmental Pollution*. 2019;247:874-882. doi:10.1016/j.envpol.2018.12.060
18. Zhang Z, Reinikainen J, Adeleke KA, Pieterse ME, Groothuis-Oudshoorn CGM. Time-varying covariates and coefficients in Cox regression models. *Ann Transl Med*. 2018;6(7):121. doi:10.21037/atm.2018.02.12
19. Hernán MA. The Hazards of Hazard Ratios. *Epidemiology*. 2010;21(1):13-15. doi:10.1097/EDE.0b013e3181c1ea43
20. Flanders WD, Klein M. Properties of 2 Counterfactual Effect Definitions of a Point Exposure. *Epidemiology*. 2007;18(4):453-460. doi:10.1097/01.ede.0000261472.07150.4f
21. Stovitz SD, Banack HR, Kaufman JS. “Depletion of the susceptibles” taught through a story, a table and basic arithmetic. *BMJ Evid Based Med*. 2018;23(5):199. doi:10.1136/bmjebm-2018-110972
22. Hernán MA, Robins JM. Causal Inference: What If. Published online 2020:311.
23. Zigler CM, Dominici F. Point: Clarifying Policy Evidence With Potential-Outcomes Thinking—Beyond Exposure-Response Estimation in Air Pollution Epidemiology. *Am J Epidemiol*. 2014;180(12):1133-1140. doi:10.1093/aje/kwu263
24. Robins J. A new approach to causal inference in mortality studies with a sustained exposure period—application to control of the healthy worker survivor effect. *Mathematical Modelling*. 1986;7(9):1393-1512. doi:10.1016/0270-0255(86)90088-6

25. Cole SR, Frangakis CE. The Consistency Statement in Causal Inference: A Definition or an Assumption? *Epidemiology*. 2009;20(1):3-5. doi:10.1097/EDE.0b013e31818ef366
26. Naimi AI, Cole SR, Kennedy EH. An Introduction to G Methods. *International Journal of Epidemiology*. Published online December 30, 2016:dyw323. doi:10.1093/ije/dyw323
27. Chiu YH, Chavarro JE, Dickerman BA, et al. Estimating the effect of nutritional interventions using observational data: the American Heart Association's 2020 Dietary Goals and mortality. *The American Journal of Clinical Nutrition*. 2021;(nqab100). doi:10.1093/ajcn/nqab100
28. Keil AP, Edwards JK, Richardson DR, Naimi AI, Cole SR. The parametric G-formula for time-to-event data: towards intuition with a worked example. *Epidemiology*. 2014;25(6):889-897. doi:10.1097/EDE.0000000000000160
29. Taubman SL, Robins JM, Mittleman MA, Hernán MA. Intervening on risk factors for coronary heart disease: an application of the parametric g-formula. *International Journal of Epidemiology*. 2009;38(6):1599-1611. doi:10.1093/ije/dyp192
30. Westreich D, Cole SR, Young JG, et al. The parametric g-formula to estimate the effect of highly active antiretroviral therapy on incident AIDS or death. *Stat Med*. 2012;31(18):2000-2009. doi:10.1002/sim.5316
31. Keil AP, Buckley JP, Kalkbrenner AE. Bayesian G-Computation for Estimating Impacts of Interventions on Exposure Mixtures: Demonstration With Metals From Coal-Fired Power Plants and Birth Weight. *American Journal of Epidemiology*. 2021;(kwab053). doi:10.1093/aje/kwab053
32. Neophytou AM, Costello S, Picciotto S, et al. Diesel Exhaust, Respirable Dust, and Ischemic Heart Disease: An Application of the Parametric g-formula. *Epidemiology*. 2019;30(2):177-185. doi:10.1097/EDE.0000000000000954
33. Neophytou AM, Costello S, Picciotto S, et al. Accelerated lung function decline in an aluminum manufacturing industry cohort exposed to PM2.5: an application of the parametric g-formula. *Occup Environ Med*. 2019;76(12):888-894. doi:10.1136/oemed-2019-105908
34. Garcia E, Urman R, Berhane K, McConnell R, Gilliland F. Effects of policy-driven hypothetical air pollutant interventions on childhood asthma incidence in southern California. *Proceedings of the National Academy of Sciences*. 2019;116(32):15883-15888. doi:10.1073/pnas.1815678116
35. Urman R, Garcia E, Berhane K, McConnell R, Gauderman WJ, Gilliland F. The Potential Effects of Policy-driven Air Pollution Interventions on Childhood Lung Development. *Am J Respir Crit Care Med*. 2019;201(4):438-444. doi:10.1164/rccm.201903-0670OC

36. Government of Canada SC. Canadian Community Health Survey (CCHS) Cycle 1.1. Published October 24, 2007. Accessed September 26, 2021. <https://www23.statcan.gc.ca/imdb/p2SV.pl?Function=getSurvey&Id=3359>
37. Government of Canada SC. Canadian Community Health Survey (CCHS) Cycle 2.1. Published October 24, 2007. Accessed September 26, 2021. <https://www23.statcan.gc.ca/imdb/p2SV.pl?Function=getSurvey&Id=4995>
38. Government of Canada SC. Canadian Community Health Survey (CCHS) Cycle 3.1. Published October 24, 2007. Accessed September 26, 2021. <https://www23.statcan.gc.ca/imdb/p2SV.pl?Function=getSurvey&Id=22642>
39. Sanmartin C, Decady Y, Trudeau R, et al. Linking the Canadian Community Health Survey and the Canadian Mortality Database: An enhanced data source for the study of mortality. *Health Rep.* 2016;27(12):10-18.
40. van Donkelaar A, Martin RV, Li C, Burnett RT. Regional Estimates of Chemical Composition of Fine Particulate Matter Using a Combined Geoscience-Statistical Method with Information from Satellites, Models, and Monitors: V4.NA.02.MAPLE. Published online January 30, 2019. doi:10.5281/zenodo.6557778
41. van Donkelaar A, Martin RV, Li C, Burnett RT. Regional Estimates of Chemical Composition of Fine Particulate Matter Using a Combined Geoscience-Statistical Method with Information from Satellites, Models, and Monitors. *Environ Sci Technol.* 2019;53(5):2595-2611. doi:10.1021/acs.est.8b06392
42. The Canadian Council of Ministers of the Environment. Canadian Ambient Air Quality Standards. Accessed June 11, 2022. <https://ccme.ca/en/air-quality-report#slide-7>
43. Pinault L, Tjepkema M, Crouse DL, et al. Risk estimates of mortality attributed to low concentrations of ambient fine particulate matter in the Canadian community health survey cohort. *Environ Health.* 2016;15:18. doi:10.1186/s12940-016-0111-6
44. Pinault LL, Weichenthal S, Crouse DL, et al. Associations between fine particulate matter and mortality in the 2001 Canadian Census Health and Environment Cohort. *Environmental Research.* 2017;159:406-415. doi:10.1016/j.envres.2017.08.037
45. Ontario Community Health Profiles Partnership. Canadian Marginalization Index (CAN-Marg)-Home. Accessed October 14, 2020. <http://www.ontariohealthprofiles.ca/canmargCAN.php>
46. Crouse DL, Philip S, van Donkelaar A, et al. A New Method to Jointly Estimate the Mortality Risk of Long-Term Exposure to Fine Particulate Matter and its Components. *Sci Rep.* 2016;6(1):18916. doi:10.1038/srep18916
47. Health Canada. Health Impacts of Air Pollution in Canada 2021 Report. Published March 15, 2021. Accessed June 17, 2021. <https://www.canada.ca/en/health-canada/services/publications/healthy-living/2021-health-effects-indoor-air-pollution.html>

48. Balduzzi S, Rücker G, Schwarzer G. How to perform a meta-analysis with R: a practical tutorial. *Evidence-Based Mental Health*. 2019;22(4):153-160. doi:10.1136/ebmental-2019-300117
49. McGrath S, Lin V, Zhang Z, et al. gfoRmula: An R Package for Estimating the Effects of Sustained Treatment Strategies via the Parametric g-formula. *Patterns*. 2020;1(3). doi:10.1016/j.patter.2020.100008
50. VanderWeele TJ, Shpitser I. A new criterion for confounder selection. *Biometrics*. 2011;67(4):1406-1413. doi:10.1111/j.1541-0420.2011.01619.x
51. Snowden JM, Rose S, Mortimer KM. Implementation of G-Computation on a Simulated Data Set: Demonstration of a Causal Inference Technique. *American Journal of Epidemiology*. 2011;173(7):731-738. doi:10.1093/aje/kwq472
52. Nasari MM, Szyszkowicz M, Chen H, et al. A class of non-linear exposure-response models suitable for health impact assessment applicable to large cohort studies of ambient air pollution. *Air Qual Atmos Health*. 2016;9(8):961-972. doi:10.1007/s11869-016-0398-z
53. Pappin AJ, Christidis T, Pinault LL, et al. Examining the Shape of the Association between Low Levels of Fine Particulate Matter and Mortality across Three Cycles of the Canadian Census Health and Environment Cohort. *Environ Health Perspect*. 2019;127(10):107008. doi:10.1289/EHP5204
54. Efron B, Tibshirani R. *An Introduction to the Bootstrap*. Chapman & Hall; 1993.
55. R Core Team. R: A language and environment for statistical computing. Published online 2021. <https://www.R-project.org/>
56. Stensrud MJ, Hernán MA. Why Test for Proportional Hazards? *JAMA*. 2020;323(14):1401. doi:10.1001/jama.2020.1267
57. Schwartz LM, Woloshin S, Dvorin EL, Welch HG. Ratio measures in leading medical journals: structured review of accessibility of underlying absolute risks. *BMJ*. 2006;333(7581):1248. doi:10.1136/bmj.38985.564317.7C
58. Daniel RM, Cousens SN, Stavola BLD, Kenward MG, Sterne J a. C. Methods for dealing with time-dependent confounding. *Statistics in Medicine*. 2013;32(9):1584-1618. doi:<https://doi.org/10.1002/sim.5686>
59. Hernan MA, Hernandez-Diaz S, Robins JM. A Structural Approach to Selection Bias. 2004;15(5):11.
60. Sheppard L, Burnett RT, Szpiro AA, et al. Confounding and exposure measurement error in air pollution epidemiology. *Air Qual Atmos Health*. 2012;5(2):203-216. doi:10.1007/s11869-011-0140-9

61. Richmond-Bryant J, Long TC. Influence of exposure measurement errors on results from epidemiologic studies of different designs. *J Expo Sci Environ Epidemiol*. 2020;30(3):420-429. doi:10.1038/s41370-019-0164-z
62. Samoli E, Butland BK, Rodopoulou S, et al. The impact of measurement error in modeled ambient particles exposures on health effect estimates in multilevel analysis: A simulation study. *Environmental Epidemiology*. 2020;4(3). doi:10.1097/EE9.0000000000000094
63. Robins JM, Wasserman LA. Estimation of Effects of Sequential Treatments by Reparameterizing Directed Acyclic Graphs. *arXiv:13021566 [stat]*. Published online 1997. Accessed July 20, 2021. <http://arxiv.org/abs/1302.1566>
64. McGrath S, Young JG, Hernán MA. Revisiting the g-null Paradox. *Epidemiology*. 2022;33(1):114-120. doi:10.1097/EDE.0000000000001431
65. VanderWeele TJ, Vansteelandt S, Robins JM. Effect decomposition in the presence of an exposure-induced mediator-outcome confounder. *Epidemiology*. 2014;25(2):300-306. doi:10.1097/EDE.0000000000000034
66. Keil AP, Edwards JK. A Review of Time Scale Fundamentals in the g-Formula and Insidious Selection Bias. *Curr Epidemiol Rep*. 2018;5(3):205-213. doi:10.1007/s40471-018-0153-0
67. Muñoz ID, van der Laan M. Population intervention causal effects based on stochastic interventions. *Biometrics*. 2012;68(2):541-549. doi:10.1111/j.1541-0420.2011.01685.x
68. van der Laan MJ, Petersen ML. Causal effect models for realistic individualized treatment and intention to treat rules. *Int J Biostat*. 2007;3(1):Article 3. doi:10.2202/1557-4679.1022
69. Weichenthal S, Ripley S, Korsiak J. Fine Particulate Air Pollution and the “No-Multiple-Versions-of-Treatment” Assumption: Does Particle Composition Matter for Causal Inference? *American Journal of Epidemiology*. Published online November 4, 2022:kwac191. doi:10.1093/aje/kwac191
